# Supplementary material for: Systematic review of knowledge translation strategies in the allied health professions
Source: PubMed Central journal article supplement (PMC3780719; doi:10.1186/1748-5908-7-70), 2012-07-25
Supplement: 1748-5908-7-70-S7.pdf [file 1748-5908-7-70-S7.pdf]

**Additional file 7: Assessment of 29 quantitative studies and three qualitative studies using separate tools**

| Author (Year)                               | Quality Assessment Tool for Quantitative Studies rating | Quality Assessment Tool for Qualitative Studies rating | Author (Year)                |
|---------------------------------------------|---------------------------------------------------------|--------------------------------------------------------|------------------------------|
| <b>Quantitative Studies (n=29)</b>          |                                                         | <b>Qualitative Studies (n=3)</b>                       |                              |
| None                                        | <b>Strong</b>                                           |                                                        |                              |
| Bekkering, GE, van Tulder MW, et al. (2005) | <b>Moderate</b>                                         | <b>5</b>                                               | Vachon, B, et al. (2009)     |
| Dualde, E, et al. (2009)                    |                                                         |                                                        |                              |
| Egen, V, et al. (2003)                      |                                                         |                                                        |                              |
| Hoffmann, W, et al. (2008)                  |                                                         |                                                        |                              |
| Stevenson, K, et al. (2006)                 |                                                         |                                                        |                              |
| Tripicchio, B, et al. (2009)                |                                                         |                                                        |                              |
| Airkasinen, M, et al. (1998)                |                                                         | <b>Weak</b>                                            | <b>4</b>                     |
| Banz, M, et al. (2004)                      |                                                         |                                                        |                              |
| Bekkering, GE, Hendricks HJM, et al. (2005) |                                                         |                                                        |                              |
| Benrimoj, SI, et al. (2007)                 |                                                         |                                                        |                              |
| Bracchi, RCG, et al. (2005)                 |                                                         |                                                        |                              |
| Brooks, VG, et al. (2001)                   |                                                         |                                                        |                              |
| Brown, CJ et al. (2005)                     |                                                         |                                                        |                              |
| Brug, J, et al. (2007)                      |                                                         |                                                        |                              |
| Fjortoft, N, et al. (2003)                  |                                                         |                                                        |                              |
| Fjortoft, N, et al. (2007)                  |                                                         |                                                        |                              |
| Gross, DP, et al. (2009)                    |                                                         |                                                        |                              |
| Hammond, A, et al. (2005)                   |                                                         |                                                        |                              |
| Hirsch, JD, et al. (2009)                   |                                                         |                                                        |                              |
| Hoeijenbos, M, et al. (2005)                |                                                         |                                                        |                              |
| Johnson, ST, et al. (2007)                  |                                                         |                                                        |                              |
| Kerssens, JJ, et al. (1999)                 |                                                         |                                                        |                              |
| Martin, BA, et al. (2010)                   |                                                         |                                                        |                              |
| McCluskey, A, et al. (2005)                 |                                                         |                                                        |                              |
| McKenna, K, et al. (2005)                   |                                                         |                                                        |                              |
| Munroe, WP, et al. (1997)                   |                                                         |                                                        |                              |
| Nikopoulou-Smyrni, P, et al. (2007)         | <b>3</b>                                                | None                                                   |                              |
| Pennington, L, et al. (2005)                |                                                         |                                                        |                              |
| Rebbeck, T, et al. (2006)                   |                                                         |                                                        |                              |
|                                             |                                                         | <b>2</b>                                               | Schreiber, J, et al. (2009)  |
|                                             |                                                         |                                                        |                              |
|                                             |                                                         | <b>1</b>                                               | Molfenter, SM, et al. (2009) |
|                                             |                                                         |                                                        |                              |
